# Supplementary material
Source: publisher figshare collection journal article supplement (https://acs.figshare.com/ndownloader/files/4734154)
Supplement: Supplementary file 1 [file 4734154]

## SUPPORT INFORMATION A

Materials used in interaction experiments were:

- ✓ Ca-Montmorillonite standard (STx-1) from Gonzales County (Texas, USA), provided by "Clay Minerals Society Source", Clay Minerals Repository, Department of Geology, University of Missouri (USA).
- ✓ Illite standard (Imt-2) from Silver Hill, Montana (USA) provided by "Clay Minerals Society Source", Clay Minerals Repository, Department of Geology, University of Missouri (USA).
- ✓ Commercial black peat was provided by Tolsa S.A. (Buyos, Lugo, Spain). Chemical characteristics (MAPA, 1994): pH (H<sub>2</sub>O) = 4.0, oxidizable organic matter (g·kg<sup>-1</sup>) = 854; total organic matter (dry ashed) (g·kg<sup>-1</sup>) = 995, carbon in humic acids (g·kg<sup>-1</sup>) = 302, carbon in fulvic acids (g·kg<sup>-1</sup>) = 183. Nitrogen (Kjeldahl) (g·kg<sup>-1</sup>) = 14, C/N = 35.4, CEC (cmol<sub>c</sub>·kg<sup>-1</sup>) = 150. Fe and Mn extracted by the Lindsay and Norvell, 1978 method (1) were 295 mg·L<sup>-1</sup> and 8.2 mg·L<sup>-1</sup> respectively.
- ✓ Synthetic Ferric Hydroxide prepared in the laboratory following the procedure of Sims et al., 1968 (2). A solution of FeCl<sub>3</sub>·6H<sub>2</sub>O (Probus) is treated with NaOH (Fe<sup>3+</sup>/OH<sup>-</sup> = 1/3) at room temperature. The precipitate is first washed with distilled water for 24 h and then with ethanol (80%) until the pH is 6.0. The brown precipitate is dried in oven at 65° C for 24 h and then ground in a mortar till a fine powder is obtained. Such material is X Ray identified as a 6 lines ferrhydrite with high specific surface (220 m<sup>2</sup>·g<sup>-1</sup>) that allows a high interaction with the chelates.
- ✓ A standard of calcareous soil (SCS) composition was 50% standard Quartz sand, 15% Ca-Montmorillonite, 5% Illite, 2% organic matter, 19% CaCO<sub>3</sub>, 1% dolomite

and 8% oxides and phosphates (7.0%  $\text{Fe}(\text{OH})_3$  , 0.5%  $\text{Al}(\text{OH})_3$ , 0.1%  $\text{MnO}_2$ , 0.004%  $\text{Cu}(\text{OH})_2$ , 0.006 %  $\text{Zn}(\text{OH})_2$  and 0.39%  $\text{CaHPO}_4$ . Standard Quartz sand (diameter 1-3 mm), was provided by the Instituto Eduardo Torroja, Madrid and acid washed. Ca-Montmorillonite and Illite was obtained from the Clay Mineral Society Source. The organic matter was the acid peal already described. Al, Cu and Zn hydroxides were prepared in the laboratory from  $\text{AlK}(\text{SO}_4)_2$  (Probus),  $\text{CuSO}_4$  an  $\text{ZnSO}_4$  and following the same methods as for the Fe(III) oxide.  $\text{MnO}_2$  was prepared from reduction of  $\text{KmnO}_4$  (Panreac) with ethanol.

## SUPPORT INFORMATION B

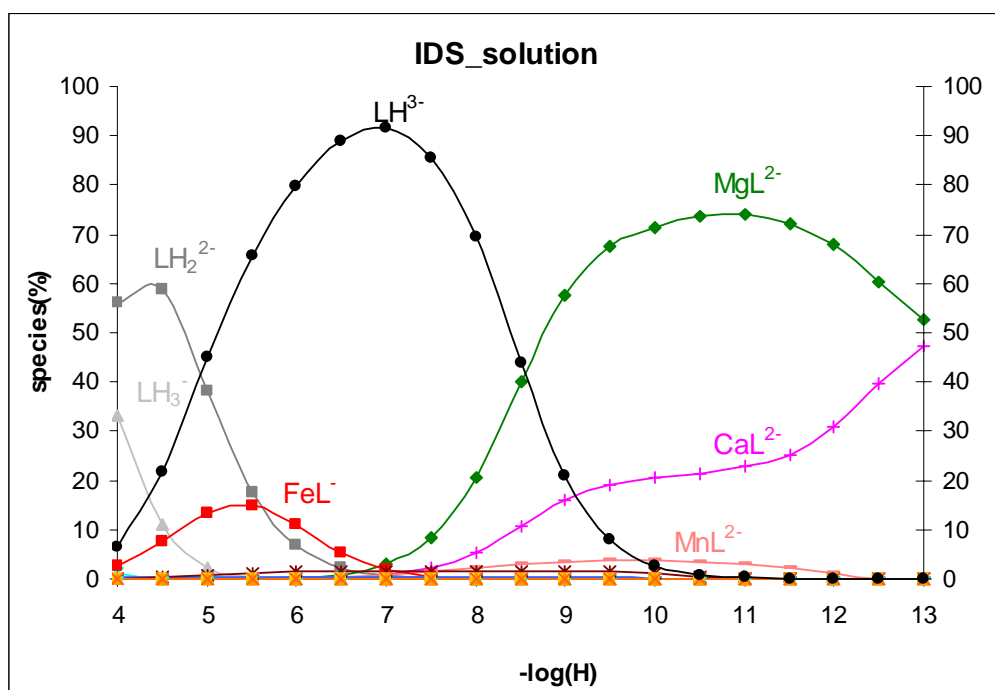

Figure 1. Species distribution for nutrient solution. No Fe precipitation

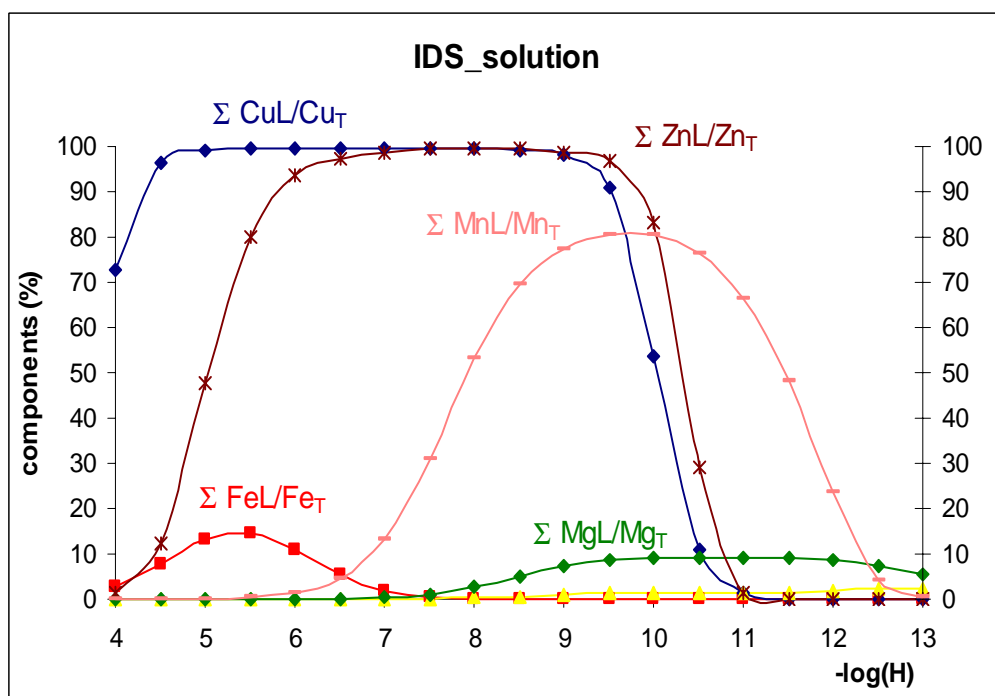

Figure 2. Element Species distribution (% respect the total element) for nutrient solution. No Fe precipitation.

## **LITERATURE CITED**

1. Lindsay, W. L.; Norvell, W. A. 1978. Development of a DTPA soil test for zinc, iron, manganese and copper. *Soil Sci. Soc. Am. J.* 42:421-428.
2. Sims, J. R., Bingham, F.T. 1968. Retention of boron by layer silicates, sesquioxides, and soil materials: *Soil Sci. Soc. Am. Proc.* 32:364-369.
